# Supplementary material
Source: publisher site journal article supplement (https://www.spandidos-publications.com/2235/downloadSupplementary)

Figure S1. Alterations in the long and short tumor diameter from day 12 to day 33. <sup>\*\*\*</sup>P<0.001 vs. NC-long diameter; <sup>###</sup>P<0.001 vs. NC-short diameter. NC, negative control; si, small interfering RNA.

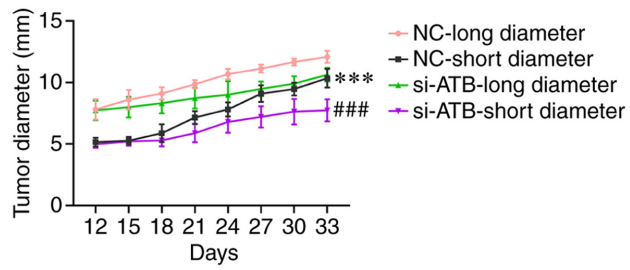

Figure S2. Transfection efficiency of miR-141-3p mimics in HCT116 cells. \*\*\*P<0.001 vs. mimics NC. miR, microRNA; NC, negative control.

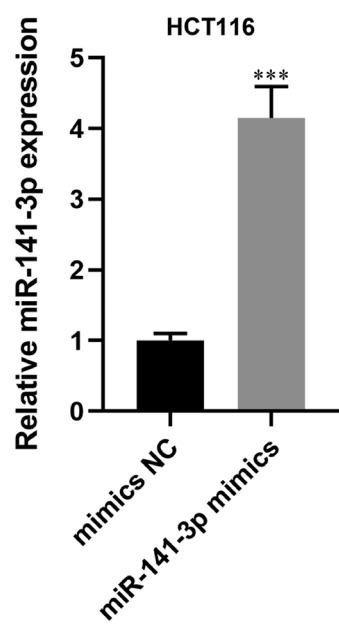

Supplement: Supplementary file 1 [file downloadSupplementary]
